# Supplementary material for: Engineering anisotropic structures of thermally insulating aerogels with high solar reflectance for energy-efficient cooling applications
Source: Royal Society of Chemistry journal article supplement (doi:10.1039/d2ta09983g), 2023-01-01
Supplement: d2ta09983g1.pdf [file d2ta09983g1.pdf]

### Supplementary Information

#### **Engineering anisotropic structures of thermally insulating aerogels with high solar reflectance for energy-efficient cooling applications**

Eunyoung Kim,<sup>1</sup>† Kit-Ying Chan,<sup>2</sup>† Jie Yang,<sup>1</sup> Harun Venkatesan,<sup>1</sup> Miracle Hope Adegun,<sup>1</sup> Heng Zhang,<sup>1</sup> Jeng-Hun Lee,<sup>1</sup> Xi Shen,<sup>2,3</sup>\* Jang-Kyo Kim<sup>1,4</sup>\*

<sup>1</sup> Department of Mechanical and Aerospace Engineering, The Hong Kong University of Science and Technology, Clearwater Bay, Kowloon, Hong Kong

<sup>2</sup> Department of Aeronautical and Aviation Engineering, The Hong Kong Polytechnic University, Hung Hom, Kowloon, Hong Kong

<sup>3</sup> The Research Institute for Sports Science and Technology, The Hong Kong Polytechnic University, Hung Hom, Kowloon, Hong Kong

<sup>4</sup> School of Mechanical and Manufacturing Engineering, The University of New South Wales, Sydney, NSW 2052, Australia

†Eunyoung Kim and Kit-Ying Chan share equal first authorship

\*Corresponding authors: Xi Shen ([xi.shen@polyu.edu.hk](mailto:xi.shen@polyu.edu.hk)); Jang-Kyo Kim ([mejkkim@ust.hk](mailto:mejkkim@ust.hk))

## S1. Characterization of BNNS and BNNS/WPU composite aerogels

The morphologies and chemical structures of exfoliated BNNS from bulk *h*-BN were characterized (Supplementary Figure 1). The SEM image shows that the lateral size of BNNS is in the range of several hundred nanometers to 5  $\mu\text{m}$  (Supplementary Figure 1a). The AFM profile presents an ultrathin thickness of BNNS ranging from 3 to 7 nm (Supplementary Figure 1b-c). The crystalline structures of bulk *h*-BN and BNNS were studied by XRD (Supplementary Figure 1d). Both materials exhibited prominent peaks of the (002), (100), (101), (102) and (004) planes at 26.7°, 41.7°, 44.0°, 50.5° and 54.3°, respectively, confirming an intact crystalline structure of *h*-BN after the chemical exfoliation to form BNNS.<sup>1, 2</sup> The XPS survey spectra (Supplementary Fig. 1e) of both WPU and BNNS/WPU aerogels showed peaks at 285, 400 and 533 eV corresponding to C1s, N1s and O1s, respectively. An additional B1s peak was detected at 190.2 eV for the BNNS/WPU aerogel because of the presence of BNNS. The deconvoluted B1s spectrum (Supplementary Fig. 1f) presented two major peaks of B-O and B-N bonds at 191.2 eV and 190.5 eV, respectively. The presence of B-O bonds indicates the formation of pendant hydroxyl groups on BN skeletons due to hydrolysis taking place during exfoliation.<sup>3-5</sup> This would facilitate the formation of hydrogen bonds between the hydroxyl groups on BNNS and the ether or carboxyl groups in the WPU chains, promoting interfacial interaction between them.<sup>6, 7</sup>

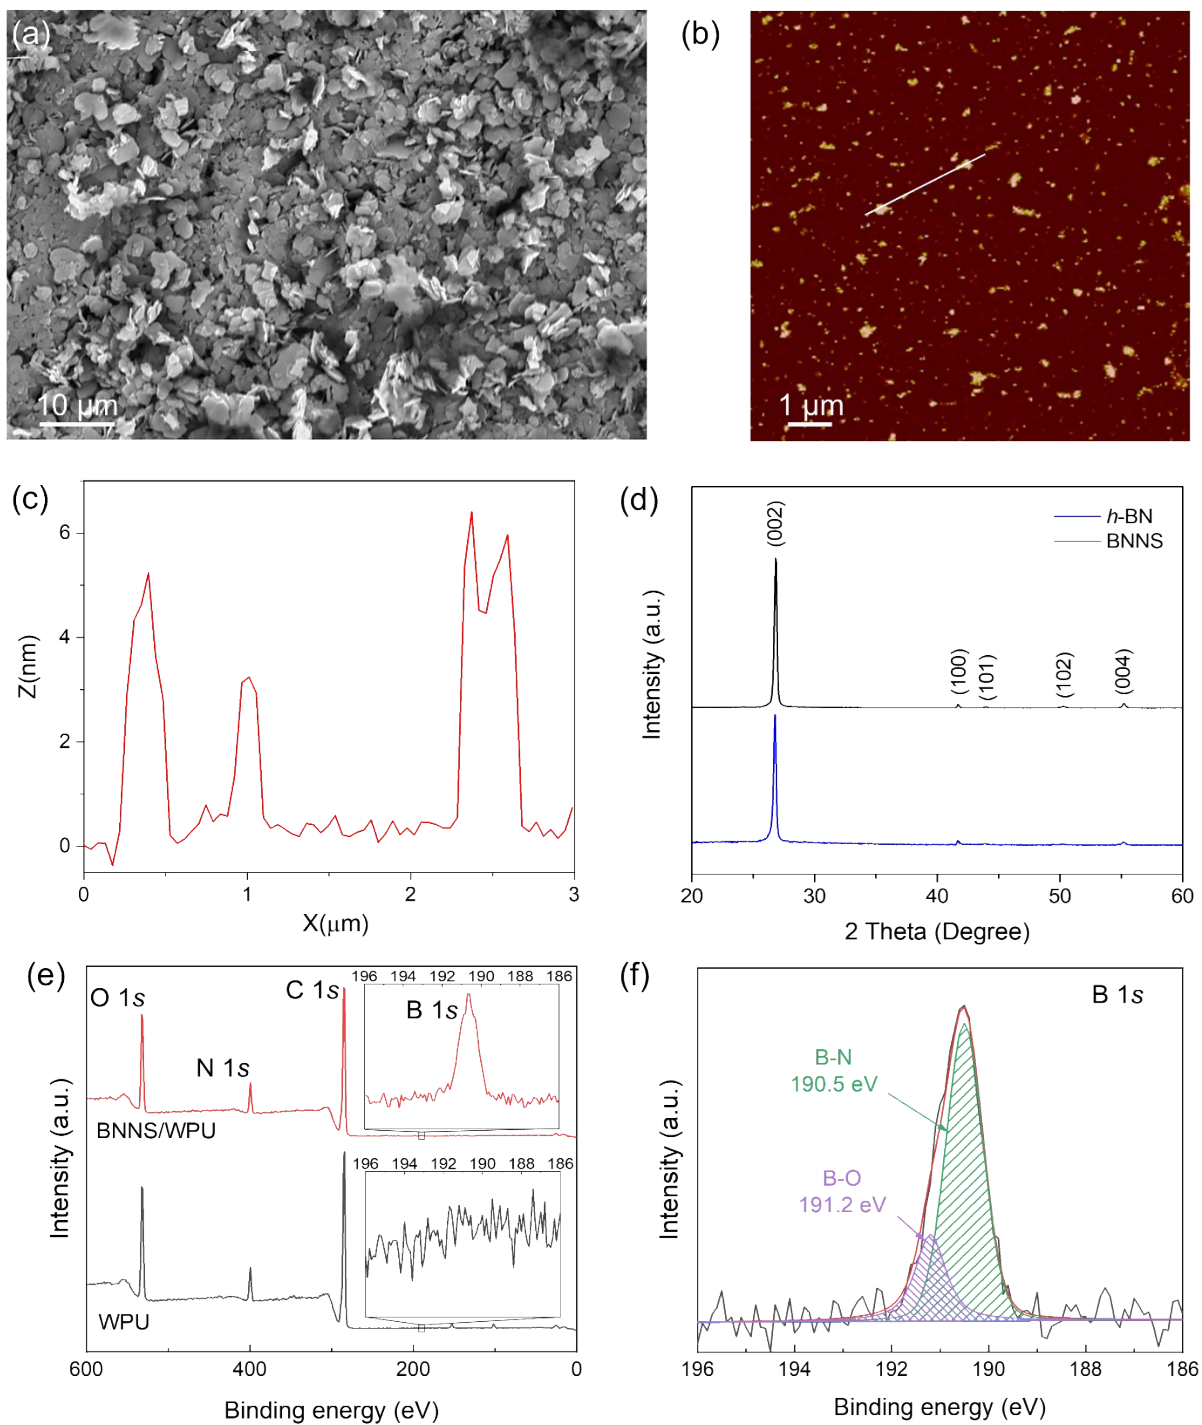

**Supplementary Figure 1. Characterization of *h*-BN and BNNS.** (a) SEM, (b) AFM images, and (c) the thickness profile obtained from AFM showing the lateral size and thickness of BNNS. (d) XRD patterns of bulk *h*-BN and BNNS. (e) XPS spectra of WPU and BNNS/WPU aerogels. (f) High-resolution B1s spectrum of BNNS/WPU aerogel.

## S2. Thermal response of BNNS/WPU composite aerogels

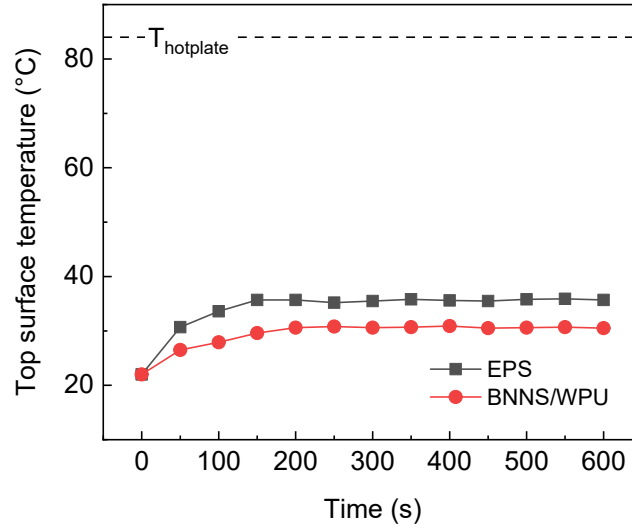

**Supplementary Figure 2.** Top surface temperatures of the BNNS/WPU aerogels and commercial EPS foam ( $k = 30.5 \text{ mW/ m K}$ ) measured using a thermal camera.

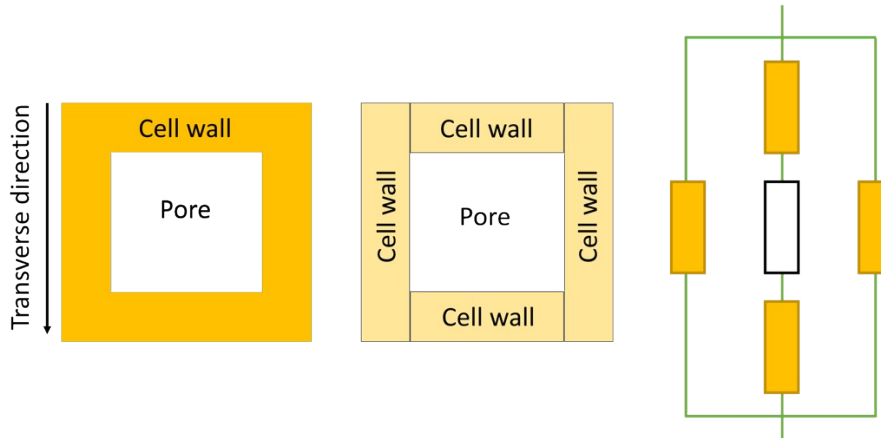

**Supplementary Figure 3.** Total thermal resistor network of heat flux in the transverse direction.

The  $k$  of the BNNS/WPU composite cell wall in the transverse and alignment directions, *i.e.*,  $k_{wall}^x$  and  $k_{wall}^y$ , are estimated using the effective medium approximation according to previous studies:<sup>8,9</sup>

$$k_{wall}^y = k_m \frac{2 + f[\beta_y(1 - L_y)(1 + \langle \cos^2 \theta \rangle) + \beta_x(1 - L_x)(1 - \langle \cos^2 \theta \rangle)]}{2 - f[\beta_y L_y(1 + \langle \cos^2 \theta \rangle) + \beta_x L_x(1 - \langle \cos^2 \theta \rangle)]} \quad (S1)$$

$$k_{wall}^x = k_m \frac{1 + f[\beta_y(1 - L_y)(1 - \langle \cos^2 \theta \rangle) + \beta_x(1 - L_x)\langle \cos^2 \theta \rangle]}{1 - f[\beta_y L_y(1 - \langle \cos^2 \theta \rangle) + \beta_x L_x \langle \cos^2 \theta \rangle]}$$

(S2)

$$\beta_i = \frac{k_i^c - k_m}{k_m + L_i(k_i^c - k_m)}$$

(S3)

$$L_y = L_z = \frac{p^2}{2(p^2 - 1)} + \frac{p}{2(1 - p^2)^{3/2}} \cos^{-1} p, \text{ for } p = \frac{a_3}{a_1} < 1$$

(S4)

$$L_x = 1 - 2L_y$$

(S5)

$$k_i^c = \frac{k_p}{1 + \frac{\gamma L_i k_p}{k_m}}$$

(S6)

$$\gamma = (1 + 2p)\alpha, \text{ for } p \leq 1$$

(S7)

$$\alpha = \frac{R_{BD}}{K_m h}$$

(S8)

where  $f$  is the volume fraction of BNNS,  $k_m$  is the  $k$  of WPU (0.21 W/mK),  $k_p$  is the  $k$  of BNNS (600 W/mK),<sup>10</sup>  $\langle \cos^2 \theta \rangle$  equals to 1 for parallel flat plate inclusions oriented perpendicular to the  $X_3$  axis, and equal to  $\frac{1}{3}$  for completely random plates,  $\alpha$  is a dimensionless parameter,  $R_{BD}$  is the Kapitza interfacial thermal resistance between BNNS and polymer matrix ( $7.6 \times 10^{-9}$  m<sup>2</sup> K/W),<sup>11</sup> and  $h$  is the thickness of BNNS.

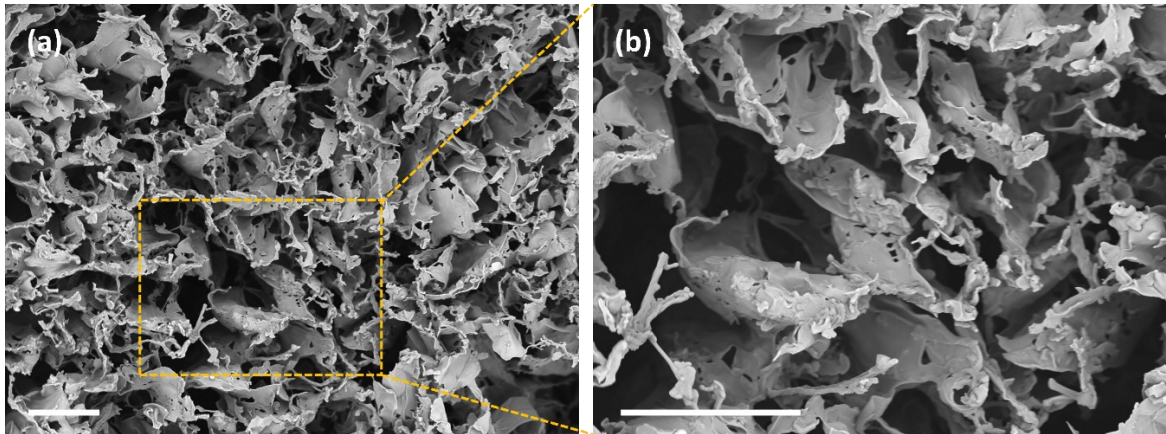

**Supplementary Figure 4.** SEM images showing the presence of holes in the cell walls. The scale bars are 100  $\mu$ m.

### S3. Outdoor test of BNNS/WPU composite aerogels

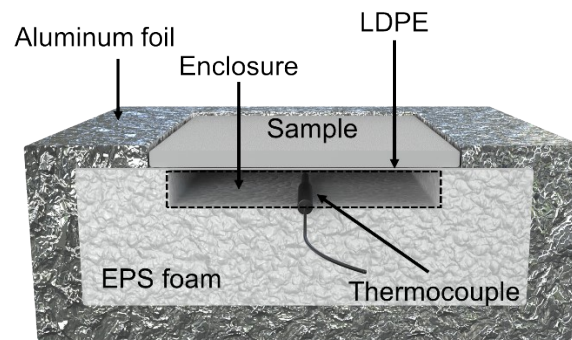

**Supplementary Figure 5.** Schematical illustration of set-up for outdoor test.

**Supplementary Table 1.** Physical properties of WPU and WPU/BNNS aerogels fabricated at different freezing temperatures and BNNS contents.

| Freezing temperature<br>(°C) | BNNS loading<br>(wt%) | Density<br>(mg/cm <sup>3</sup> ) | Porosity<br>(%) |
|------------------------------|-----------------------|----------------------------------|-----------------|
| -20                          | 0                     | 36.7 ± 2.0                       | 96.4            |
|                              | 10                    | 35.5 ± 1.4                       | 96.7            |
| -50                          | 0                     | 28.6 ± 2.3                       | 97.2            |
|                              | 10                    | 27.1 ± 0.8                       | 97.5            |
| -196                         | 0                     | 25.5 ± 0.2                       | 97.5            |
|                              | 10                    | 20.2 ± 0.6                       | 98.1            |

**Supplementary Table 2.** Comparison of thermal and optical properties of the current BNNS/WPU aerogel with other structures reported in the literature.

| Materials                                      | $k_{\text{trans}}$ (for anisotropic structure)<br>or<br>$k$ (for isotropic structure)<br>(mW/m K) | Solar reflectance (%) | Reference        |
|------------------------------------------------|---------------------------------------------------------------------------------------------------|-----------------------|------------------|
| BNNS/PVA aerogel                               | 23.5                                                                                              | 93.8                  | 12               |
| PE aerogel                                     | 28                                                                                                | 92.2                  | 13               |
| PDMS/PE aerogel                                | 32                                                                                                | 96                    | 14               |
| Superhydrophobic cellulose aerogel             | 28                                                                                                | 93                    | 15               |
| CNC aerogel                                    | 26                                                                                                | 96                    | 16               |
| Hollow microfibers cooler                      | 14                                                                                                | 94                    | 17               |
| Nanowood                                       | 30                                                                                                | 95                    | 18               |
| TiO <sub>2</sub> /Silica aerogel nanocomposite | 29                                                                                                | 90                    | 19               |
| <b>BNNS/WPU aerogel</b>                        | <b>16.2</b>                                                                                       | <b>97</b>             | <b>This work</b> |

### Supplementary references

1. X. Hou, M. Wang, L. Fu, Y. Chen, N. Jiang, C.-T. Lin, Z. Wang and J. Yu, *Nanoscale*, 2018, **10**, 13004-13010.
2. D. Fan, J. Feng, J. Liu, T. Gao, Z. Ye, M. Chen and X. Lv, *Ceram. Int.*, 2016, **42**, 7155-7163.
3. B. Zhang, Q. Wu, H. Yu, C. Bulin, H. Sun, R. Li, X. Ge and R. Xing, *Nanoscale Res. Lett.*, 2017, **12**, 1-7.
4. W. Wang, S. J. Chen, F. B. De Souza, B. Wu and W. H. Duan, *Nanoscale*, 2018, **10**, 1004-1014.
5. Y. Shi, C. Hamsen, X. Jia, K. K. Kim, A. Reina, M. Hofmann, A. L. Hsu, K. Zhang, H. Li and Z.-Y. Juang, *Nano Lett.*, 2010, **10**, 4134-4139.
6. F. Liu, R. Han, S. Naficy, G. Casillas, X. Sun and Z. Huang, *ACS Applied Nano Materials*, 2021, **4**, 7988-7994.
7. X. Li, P. Bandyopadhyay, T. Kshetri, N. H. Kim and J. H. Lee, *J. Mater. Chem. A*, 2018, **6**, 21501-21515.
8. C.-W. Nan, R. Birringer, D. R. Clarke and H. Gleiter, *J. Appl. Phys.*, 1997, **81**, 6692-6699.
9. X. Shen, Z. Wang, Y. Wu, X. Liu, Y.-B. He and J.-K. Kim, *Nano Lett.*, 2016, **16**, 3585-3593.
10. S. Yu, X. Shen and J.-K. Kim, *Mater. Horiz.*, 2021, **8**, 3009-3042.



11. Z.-G. Wang, W. Liu, Y.-H. Liu, Y. Ren, Y.-P. Li, L. Zhou, J.-Z. Xu, J. Lei and Z.-M. Li, *Compos. B Eng.*, 2020, **180**, 107569.
12. J. Yang, K.-Y. Chan, H. Venkatesan, E. Kim, M. H. Adegun, J.-H. Lee, X. Shen and J. K. Kim, *Nano-Micro Lett.*, 2022, **14**, 1-16.
13. A. Leroy, B. Bhatia, C. C. Kelsall, A. Castillejo-Cuberos, M. Di Capua H, L. Zhao, L. Zhang, A. Guzman and E. Wang, *Sci. Adv.*, 2019, **5**, eaat9480.
14. M. Yang, W. Zou, J. Guo, Z. Qian, H. Luo, S. Yang, N. Zhao, L. Pattelli, J. Xu and D. S. Wiersma, *ACS Appl. Mater. Interfaces*, 2020, **12**, 25286-25293.
15. X. Yue, H. Wu, T. Zhang, D. Yang and F. Qiu, *Energy*, 2022, **245**, 123287.
16. C. Cai, Z. Wei, C. Ding, B. Sun, W. Chen, C. Gerhard, E. Nimerovsky, Y. Fu and K. Zhang, *Nano Lett.*, 2022, **22**, 4106-4114.
17. H. Zhong, Y. Li, P. Zhang, S. Gao, B. Liu, Y. Wang, T. Meng, Y. Zhou, H. Hou and C. Xue, *ACS Nano*, 2021, **15**, 10076-10083.
18. Z.-L. Yu, N. Yang, L.-C. Zhou, Z.-Y. Ma, Y.-B. Zhu, Y.-Y. Lu, B. Qin, W.-Y. Xing, T. Ma and S.-C. Li, *Sci. Adv.*, 2018, **4**, eaat7223.
19. L. An, D. Petit, M. Di Luigi, A. Sheng, Y. Huang, Y. Hu, Z. Li and S. Ren, *ACS Appl. Nano Mater.*, 2021, **4**, 6357-6363.
